# Supplementary material for: Synthesis and biological evaluation of 123I-labeled pyridyl benzoxazole derivatives: novel β-amyloid imaging probes for single-photon emission computed tomography
Source: Royal Society of Chemistry journal article supplement (doi:10.1039/c4ra10742j), 2014-12-01
Supplement: c4ra10742j1.pdf [file c4ra10742j1.pdf]

## Supporting Information

### **Synthesis and Biological Evaluation of $^{123}\text{I}$ -Labeled Pyridyl Benzoxazole Derivatives: Novel $\beta$ -Amyloid Imaging Probes for Single-Photon Emission Computed Tomography**

Hiroyuki Watanabe<sup>a</sup>, Masahiro Ono<sup>a\*</sup>, Shimpei Iikuni<sup>a</sup>, Hiroyuki Kimura<sup>a</sup>, Yoko Okamoto<sup>b</sup>, Masafumi Ihara<sup>c</sup>, Hideo Saji<sup>a</sup>

<sup>a</sup>Department of Patho-Functional Bioanalysis, Graduate School of Pharmaceutical Sciences, Kyoto University, 46-29 Yoshida Shimoadachi-cho, Sakyo-ku, Kyoto 606-8501, Japan

<sup>b</sup>Department of Pathology, National Cerebral and Cardiovascular Center, 5-7-1 Fujishiro-dai, Suita, Osaka 565-8565, Japan

<sup>c</sup>Department of Stroke and Cerebrovascular Diseases, National Cerebral and Cardiovascular Center, 5-7-1 Fujishiro-dai, Suita, Osaka 565-8565, Japan

\*To whom correspondence should be addressed: Phone: +81-75-753-4608, Fax: +81-75-753-4568, e-mail: ono@pharm.kyoto-u.ac.jp

## Method

### In vitro stability in mouse plasma

[<sup>125</sup>I]9 (11 kBq, 10 μL) was added to the mouse plasma (200 μL), and the plasma samples (n = 3) were incubated at 37°C for 1 h. After incubation, plasma samples were mixed with equal volumes of acetonitrile followed by centrifugation at 4,500 rpm for 10 min to remove the denatured proteins. The supernatant was filtrated using 0.45 μm filter (Millipore; Billerica, MA, USA). Then, the filtrate was analyzed by HPLC on a Cosmosil C18 column (Nacalai Tesque, Kyoto, Japan, 5C<sub>18</sub>-AR-II, 4.6 mm × 150 mm), eluting with an isocratic solvent of H<sub>2</sub>O:acetonitrile (3:7) at flow rate of 1.0 ml/min.

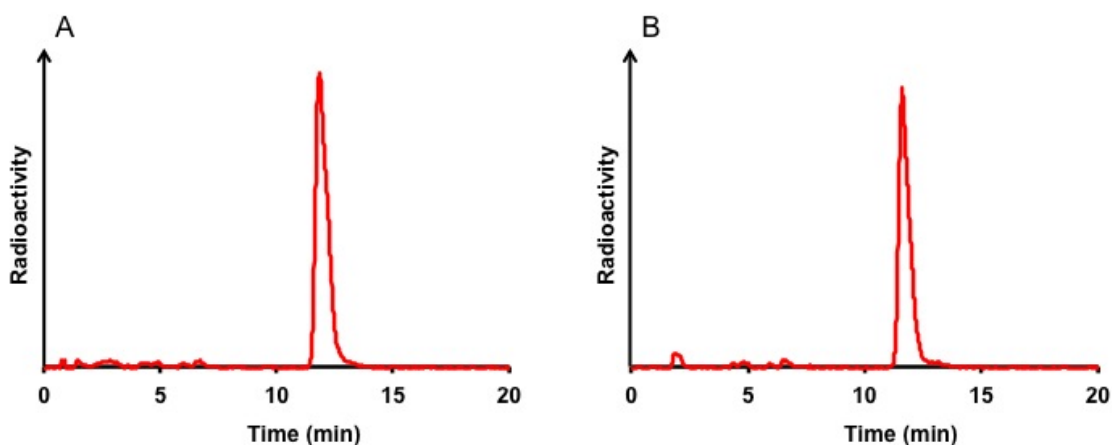

**Figure S1.** Representative HPLC profiles of [<sup>125</sup>I]9 in mouse plasma before (A) and after incubation for 1 h (B) at 37°C.

\\10.242.96.55\cpl-L\ff\^(nmr400)\data\byotai\watanabe\141113-1\_Proton-1-1.jdf

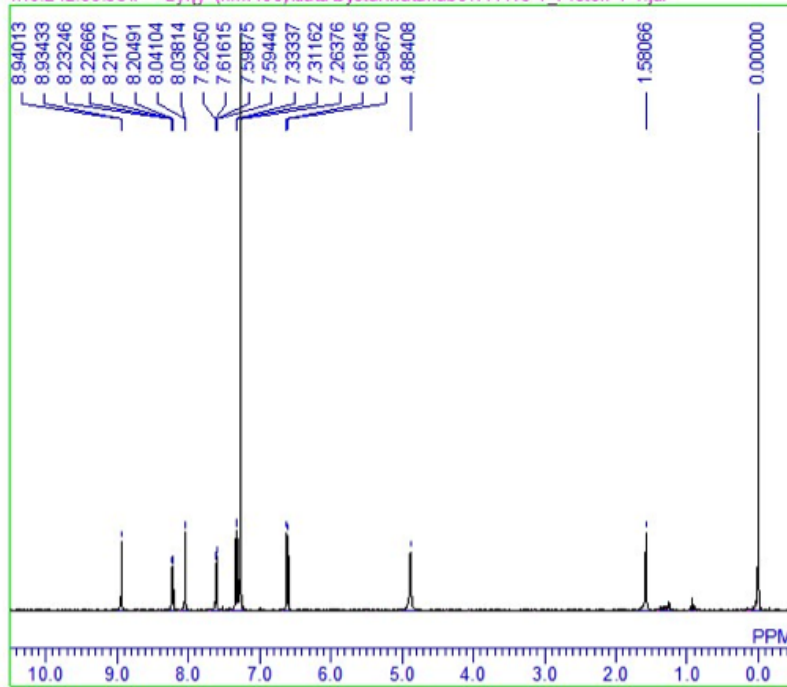

DFILE 141113-1\_Proton-1-1  
 COMNT single\_pulse  
 DATIM 2014-11-14 13:26:30  
 OBNUC 1H  
 EXMOD proton.jxp  
 OBFREQ 399.78 MHz  
 OBSET 4.19 KHz  
 OBFIN 7.29 Hz  
 POINT 16384  
 FREQU 9498.48 Hz  
 SCANS 8  
 ACQTM 1.7249 sec  
 PD 5.0000 sec  
 PW1 3.06 usec  
 IRNUC 1H  
 CTEMP 19.1 c  
 SLVNT CDCL3  
 EXREF 0.00 ppm  
 BF 0.12 Hz  
 RGAIN 54

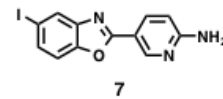

\\10.242.96.55\cpl-L\ff\^(nmr400)\data\byotai\watanabe\141113-2\_Proton-1-1.jdf

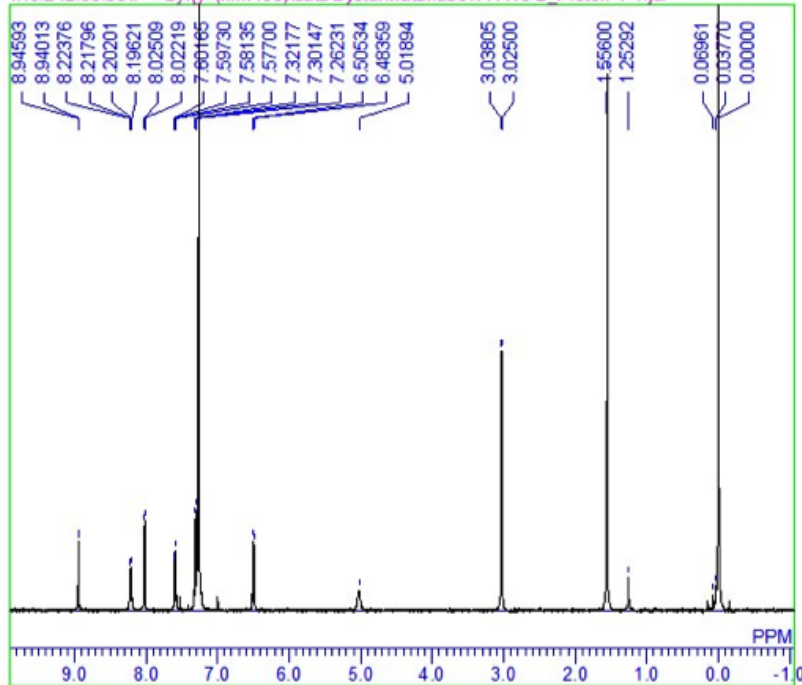

DFILE 141113-2\_Proton-1-1  
 COMNT single\_pulse  
 DATIM 2014-11-14 13:30:32  
 OBNUC 1H  
 EXMOD proton.jxp  
 OBFREQ 399.78 MHz  
 OBSET 4.19 KHz  
 OBFIN 7.29 Hz  
 POINT 16384  
 FREQU 9498.48 Hz  
 SCANS 8  
 ACQTM 1.7249 sec  
 PD 5.0000 sec  
 PW1 3.06 usec  
 IRNUC 1H  
 CTEMP 19.2 c  
 SLVNT CDCL3  
 EXREF 0.00 ppm  
 BF 0.12 Hz  
 RGAIN 50

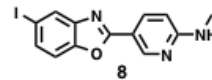

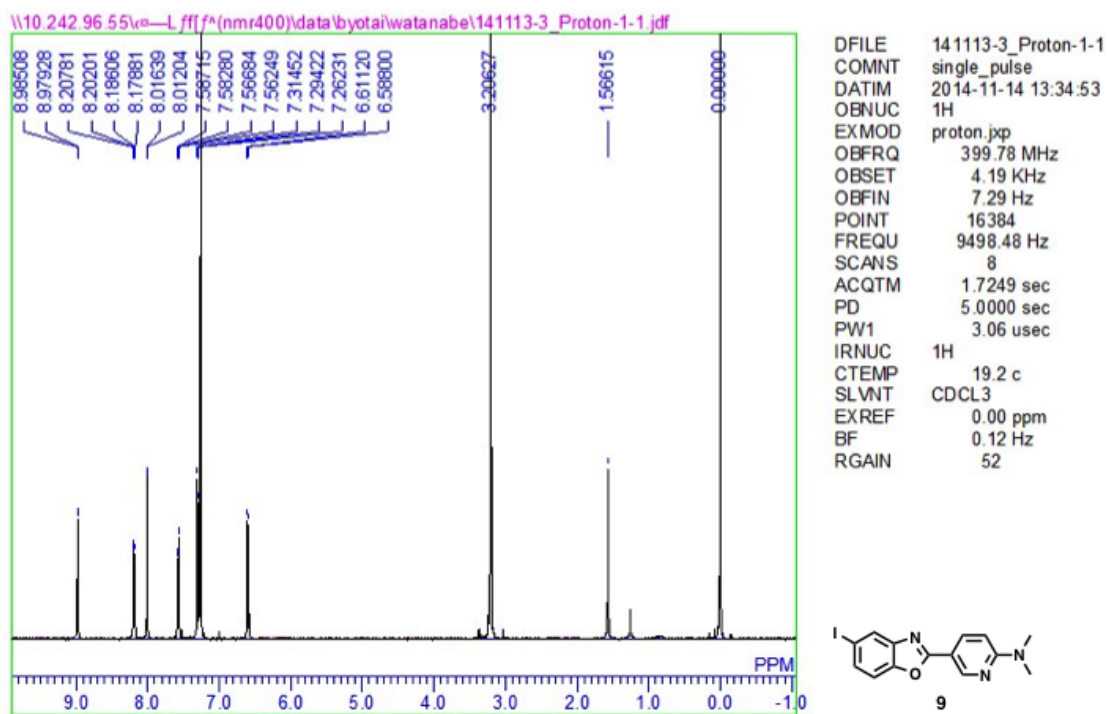

**Figure S2.**  $^1\text{H}$ -NMR spectrum of compounds **7**, **8**, and **9**.

GCmateII  
2014/03/20

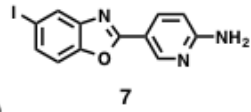

Page 1

File: teruya2039  
Sample: PBOX-1(CHCl3,70eV)  
Instrument: JEOL GCmateII  
Inlet: Direct Probe

Date Run: 03-20-2014 (Time Run: 11:55:25)

Ionization mode: EI+

Printed by: kyoto-pharmaceutical Univ.

Scan: 59  
Base: m/z 337; 94.4%FS TIC: 3208701

R.T.: 1.17

#Ions: 179

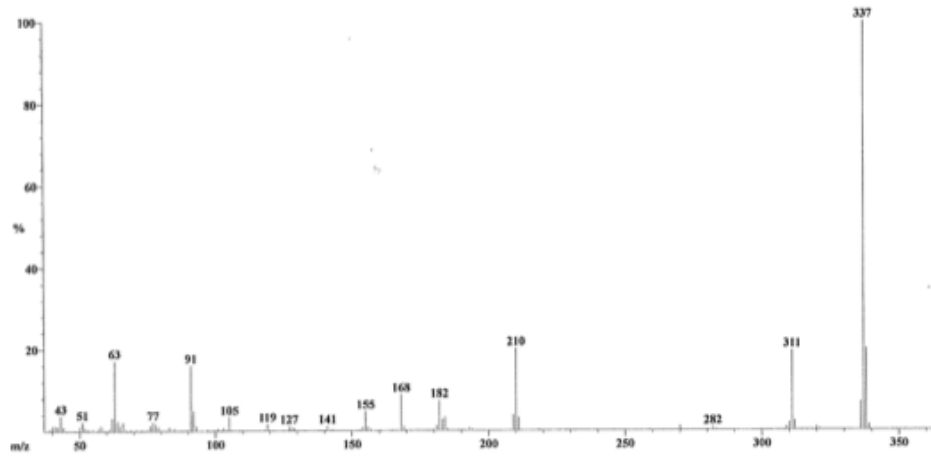

GCmateII  
2014/03/20

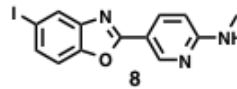

Page 1

File: teruya2041  
Sample: PBOX-2(CHCl3,70eV)  
Instrument: JEOL GCmateII  
Inlet: Direct Probe

Date Run: 03-20-2014 (Time Run: 12:23:00)

Ionization mode: EI+

Printed by: kyoto-pharmaceutical Univ.

Scan: 68  
Base: m/z 351; 92.8%FS TIC: 4552832

R.T.: 1.35

#Ions: 240

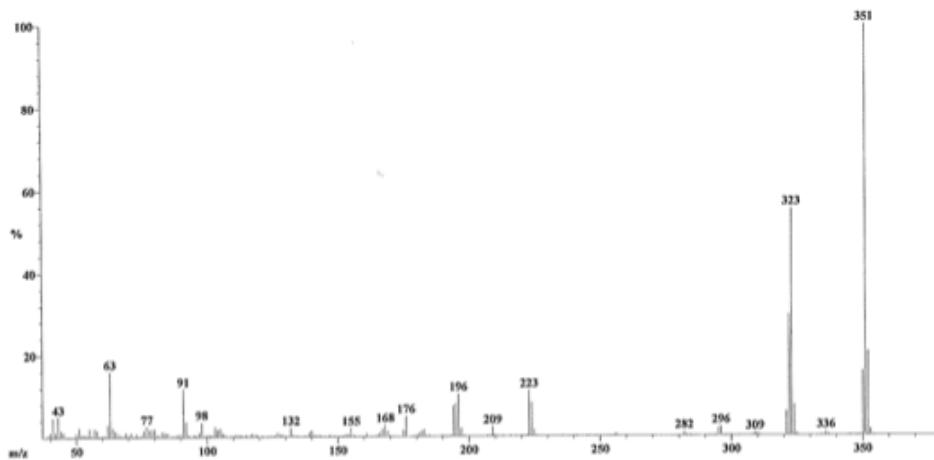

GCmateII  
2014/03/20

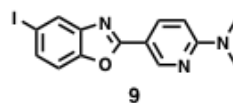

Page 1

File: teruya2043  
Sample: PBOX-3(CHCl3,70eV)  
Instrument: JEOL GCmateII  
Inlet: Direct Probe

Date Run: 03-20-2014 (Time Run: 12:55:11)

Ionization mode: EI+

Printed by: kyoto-pharmaceutical Univ.

Scan: 67  
Base: m/z 365; 79.5%FS TIC: 3691691

R.T.: 1.33

#Ions: 197

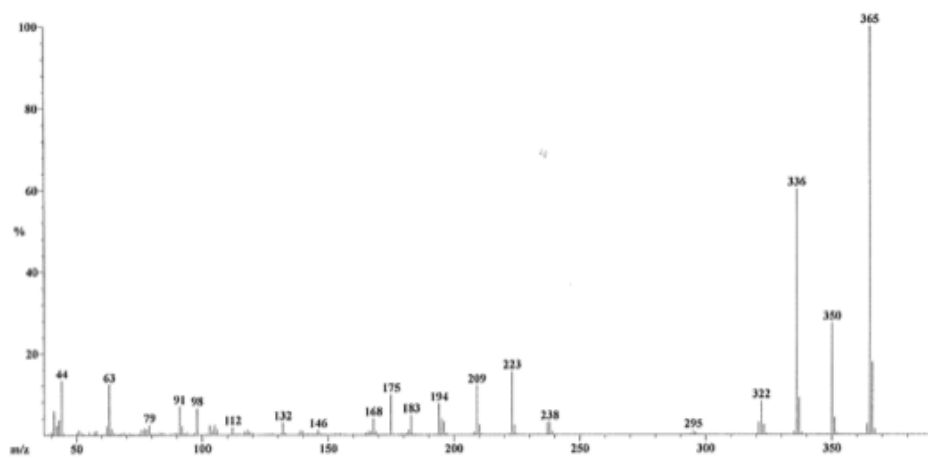

Figure S3. MS data of compounds 7, 8, and 9.
